# Supplementary material for: Characterization of Extracellular Vesicles Produced by Aspergillus fumigatus Protoplasts
Source: PubMed Central journal article supplement (PMC7426166; doi:10.1128/msphere.00476-20), 2020-08-12

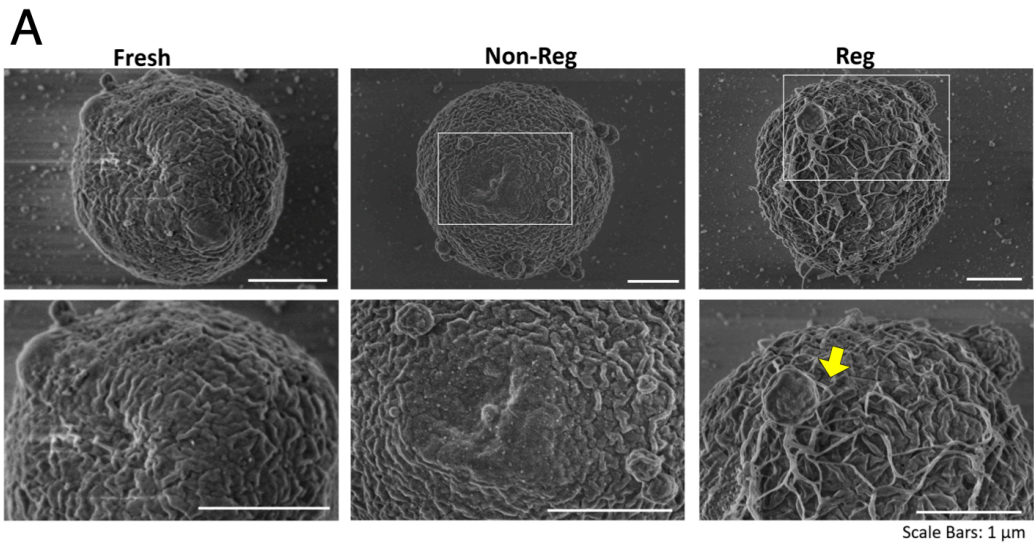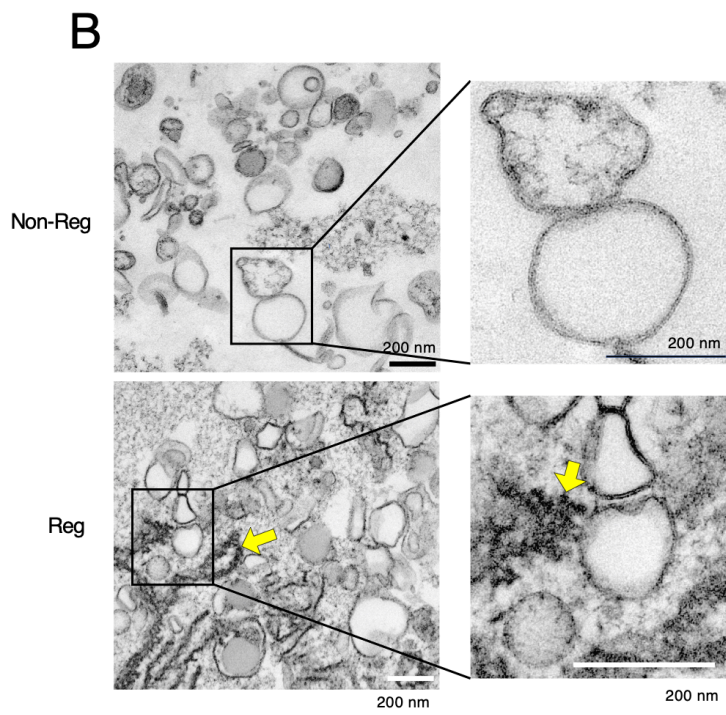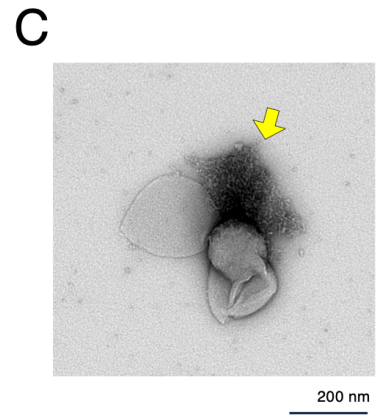

Supplement: mSphere.00476-20-sf001.pdf [file mSphere.00476-20-sf001.pdf]
